# Supplementary material
Source: publisher figshare collection journal article supplement (https://diabetesjournals.figshare.com/articles/dataset/_/13235189)
Supplement: Supplementary file 1 [file 2]

## Sheet: Table S1 - CR for base case
Brüne et al.: Healthcare utilization and costs in individuals with diabetes with and without comorbid depression in Germany: Results of the cross-sectional DiaDec Study
Supplemental Tables
Table S1. Multiple Cost Ratios of healthcare costs for 9 quarters per person with 95% CI - base case analysis
		Group B vs. Group A
Total healthcare1
Model 1		1.66 (1.50-1.82)2
Model 2		1.58 (1.43-1.74)2
Model 3		1.25 (1.14-1.36)2
Inpatient care3
Model 1		1.94 (1.60-2.36)2
Model 2		1.76 (1.44-2.14)2
Model 3		1.34 (1.10-1.63)2
Outpatient care1
Model 1		1.36 (1.27-1.46)2
Model 2		1.35 (1.26-1.44)2
Model 3		1.20 (1.12-1.27)2
Medications, assistive devices1
Model 1		1.62 (1.45-1.81)2
Model 2		1.61 (1.43-1.81)2
Model 3		1.23 (1.11-1.36)2
1Gamma regression; 2two-sided p-value <0.05; 3two-part models;
Model 1: cost ratios adjusted for age and sex with n=1,634 (notwithstanding n=1,631 for medications);
Model 2: Model 1 + additional adjustment for occupation, receipt of retirement pension,
duration of education, country of birth, marital status, living with a partner with
n=1,586 (notwithstanding n=1,584 for medications);
Model 3: Model 2 + additional adjustment for diabetes severity, intake of antihyperglycemic
medication, diabetes duration, diabetes type, comorbidities with
n=1,544 (notwithstanding n=1,542 for medications);

## Sheet: Table S2 - CR for subgroups
Brüne et al.: Healthcare utilization and costs in individuals with diabetes with and without comorbid depression in Germany: Results of the cross-sectional DiaDec Study
Supplemental Tables
Table S2. Multiple Cost Ratios of healthcare costs for 9 quarters per person with 95% CI - subgroup analysis
	Group 2 vs. Group 1	Group 3 vs. Group 1	Group 4 vs. Group 1
Total healthcare1
Model 1	1.57 (1.29-1.90)2	1.65 (1.46-1.86)2	1.75 (1.47-2.10)2
Model 2	1.51 (1.25-1.84)2	1.58 (1.41-1.78)2	1.61 (1.35-1.93)2
Model 3	1.32 (1.11-1.56)2	1.18 (1.06-1.31)2	1.37 (1.17-1.60)2
Inpatient care3
Model 1	1.60 (1.06-2.43)2	1.95 (1.55-2.46)2	2.22 (1.60-3.07)2
Model 2	1.55 (1.03-2.34)2	1.76 (1.40-2.22)2	1.92 (1.38-2.69)2
Model 3	1.37 (0.92-2.06)	1.20 (0.95-1.52)	1.71 (1.22-2.39)2
Outpatient care1
Model 1	1.44 (1.26-1.65)2	1.31 (1.21-1.42)2	1.42 (1.26-1.61)2
Model 2	1.44 (1.26-1.64)2	1.30 (1.20-1.41)2	1.39 (1.23-1.58)2
Model 3	1.44 (1.27-1.62)2	1.12 (1.03-1.20)2	1.18 (1.06-1.33)2
Medications, assistive devices1
Model 1	1.72 (1.37-2.16)2	1.63 (1.42-1.87)2	1.51 (1.23-1.86)2
Model 2	1.64 (1.30-2.07)2	1.64 (1.42-1.89)2	1.51 (1.22-1.87)2
Model 3	1.19 (0.97-1.45)	1.25 (1.10-1.41)2	1.22 (1.01-1.47)2
1Gamma regression; 2two-sided p-value <0.05; 3two-part models;
Model 1: cost ratios adjusted for age and sex with n=1,634 (notwithstanding n=1,631 for medications);
Model 2: Model 1 + additional adjustment for occupation, receipt of retirement pension,
duration of education, country of birth, marital status, living with a partner with
n=1,586 (notwithstanding n=1,584 for medications);
Model 3: Model 2 + additional adjustment for diabetes severity, intake of antihyperglycemic
medication, diabetes duration, diabetes type, comorbidities with
n=1,544 (notwithstanding n=1,542 for medications);
